# Supplementary material for: Wheat Straw-Derived N-, O-, and S-Tri-doped Porous Carbon with Ultrahigh Specific Surface Area for Lithium-Sulfur Batteries
Source: MDPI journal article supplement (doi:10.3390/ma11060989), 2018-06-11
Supplement: s1 [file s1]

## Supplementary Files

# Wheat straw-derived N-, O-, and S-tridoped porous carbon with ultrahigh specific surface area for lithium-sulfur batteries

Feng Chen <sup>1</sup>, Lulu Ma <sup>1</sup>, Jiangang Ren <sup>1</sup>, Mou Zhang <sup>1</sup>, Xinyu Luo <sup>2</sup>, Bing Li <sup>1</sup>, Zhiming Song <sup>1,\*</sup> and Xiangyang Zhou <sup>2,\*</sup>

<sup>1</sup> School of Resource and Environment, Henan University of Engineering, No. 1, Xianghe Road, Zhengzhou 451191, China; chenfeng871588@163.com (F.C.); malulu1001@163.com (L.M.); renjiangang2005@126.com (J.R.); mouzhang1015@163.com (M.Z.); hngclb@126.com (B.L.)

<sup>2</sup> School of Metallurgy and Environment, Central South University, Lushan South Street 932, Yuelu District, Changsha 410083, China; 17307484092@163.com

\* Correspondence: songzhimin1961@126.com (Z.S.); hncsyjy308@163.com (X.Z.); Tel.: +86-0371-6250-8218 (Z.S.); +86-0731-8883-6329 (X.Z.)

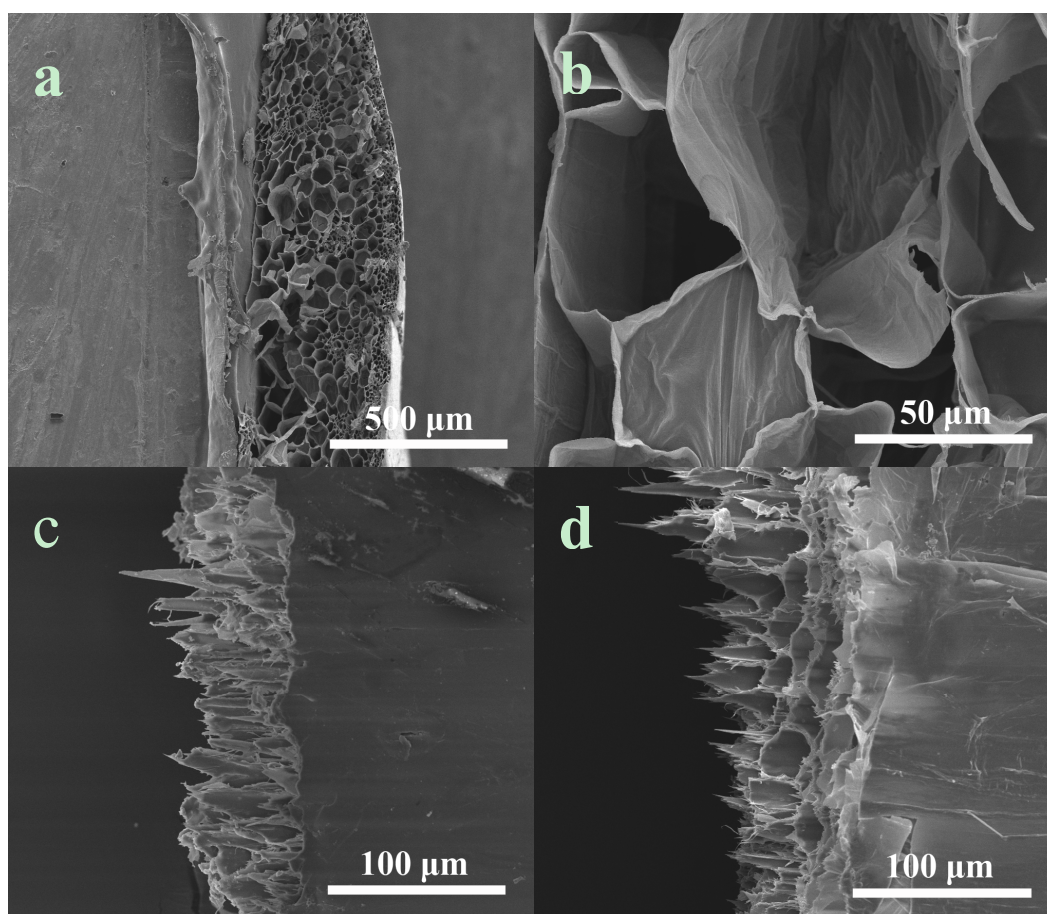

**Figure S1.** SEM images of cross section (a-b), outside surface (c), and internal surface (d) for wheat straw.

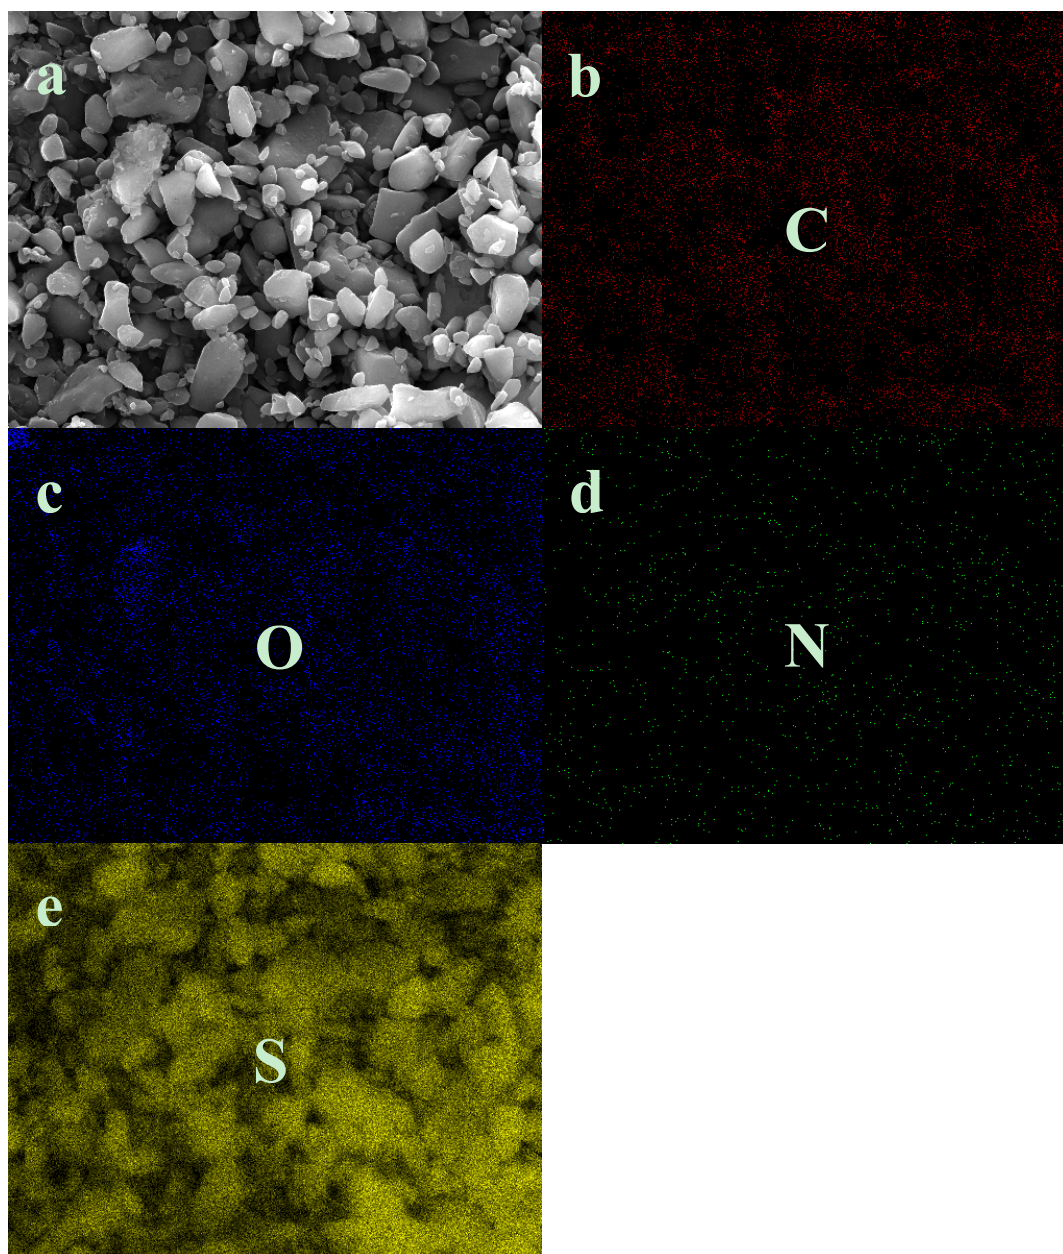

**Figure S2.** SEM image of NOSPC/S (a) and corresponding elemental maps of C (b), O (c), N (d), and S (e).

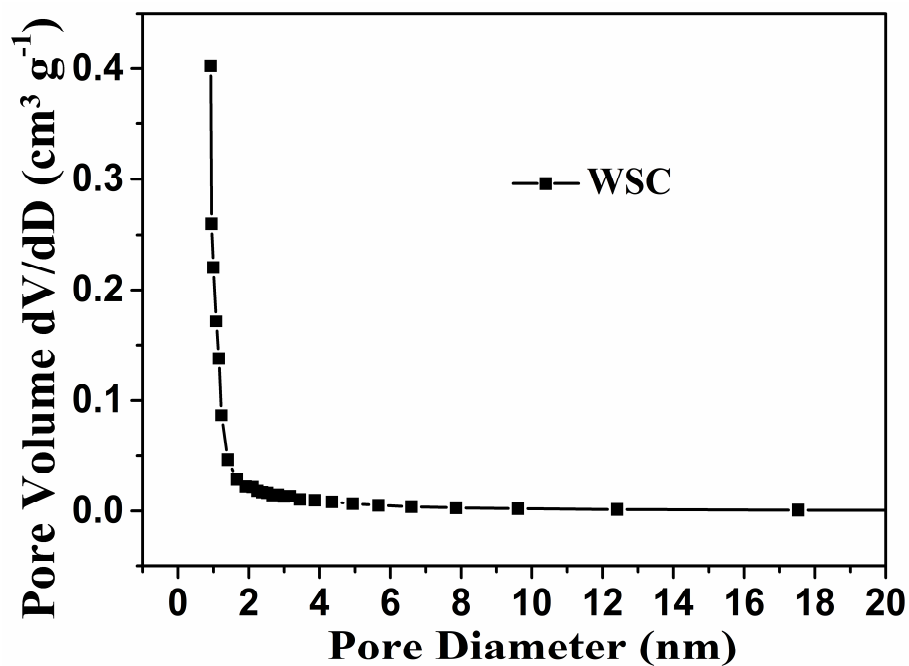

**Figure S3.** Pore size distribution curve of WSC.

**Table S1.** The combustion elemental analysis for NOSPC.

| Samples | C<br>[wt%] | H<br>[wt%] | O<br>[wt%] | N<br>[wt%] | S [wt%] |
|---------|------------|------------|------------|------------|---------|
| NOSPC   | 80.59      | 0.18       | 9.12       | 1.01       | 1.35    |

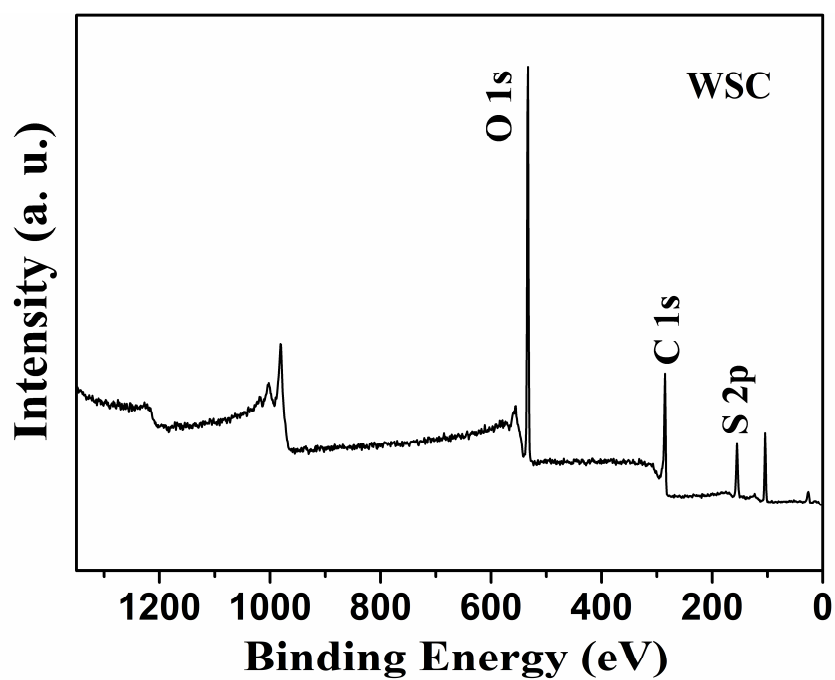

**Figure S4.** XPS spectrum of WSC.

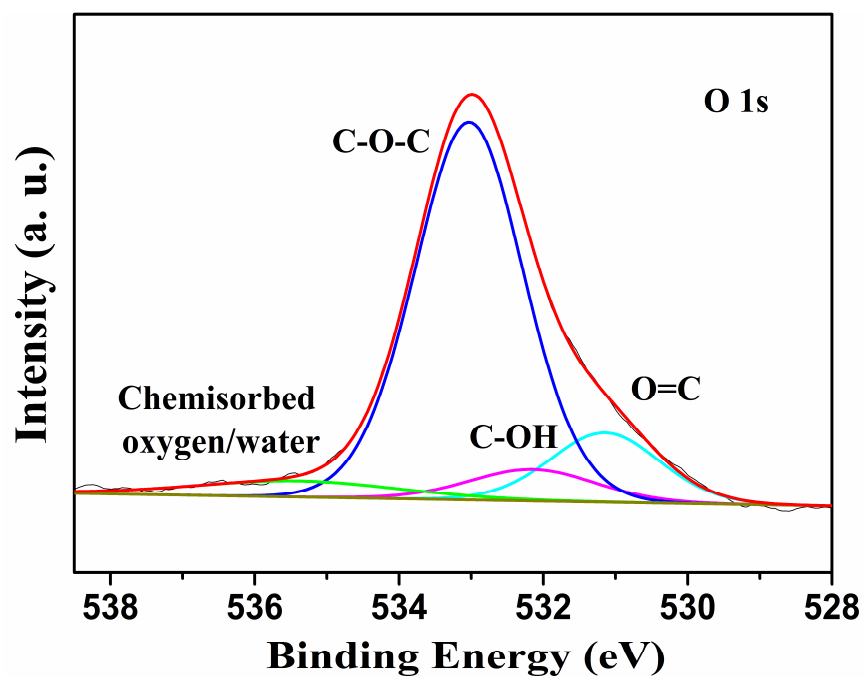

Figure S5. High-resolution XPS spectrum of O 1s for NOSPC.

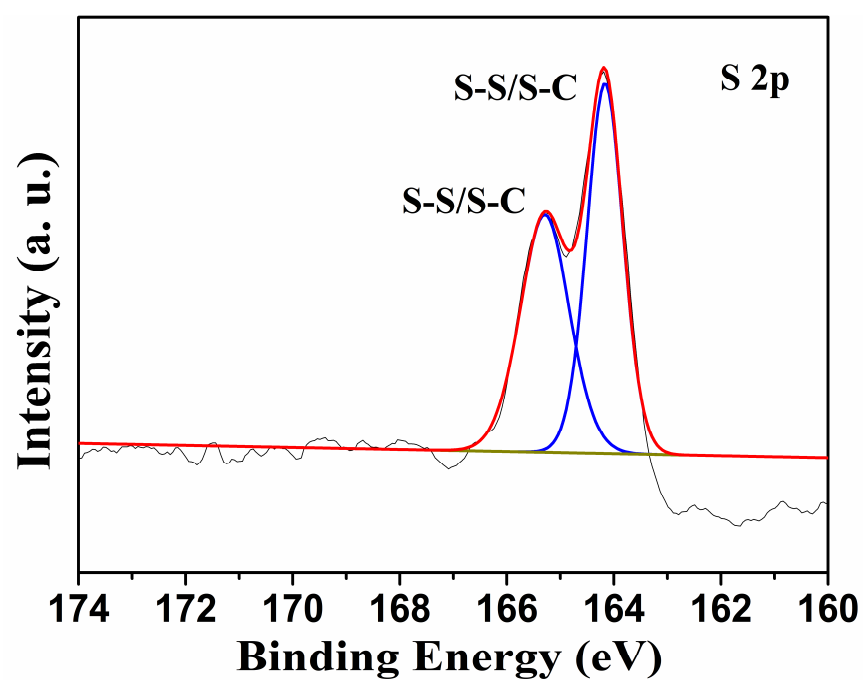

Figure S6. High-resolution XPS spectrum of S 2p for NOSPC.

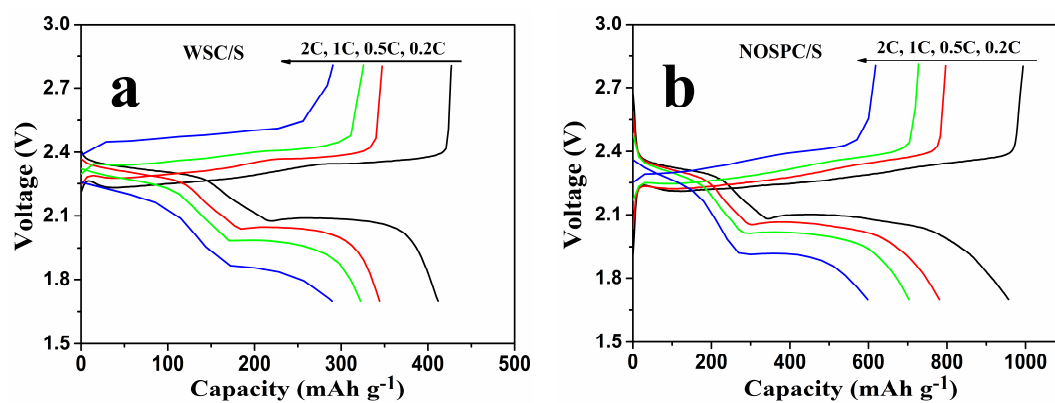

**Figure S7.** Charge and discharge voltage profiles of WSC/S (a) and NOSPC/S (b) at different current densities from 0.2 to 2 C.

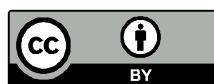

© 2018 by the authors. Submitted for possible open access publication under the terms and conditions of the Creative Commons Attribution (CC BY) license (<http://creativecommons.org/licenses/by/4.0/>).
